# Supplementary material for: Sensitive determination of the anti-viral drug valganciclovir by a nafion/magnetic nanoparticle-graphene/GCE as a voltammetric sensor
Source: Royal Society of Chemistry journal article supplement (doi:10.1039/c9ay01046g), 2019-01-01
Supplement: c9ay01046g1.pdf [file c9ay01046g1.pdf]

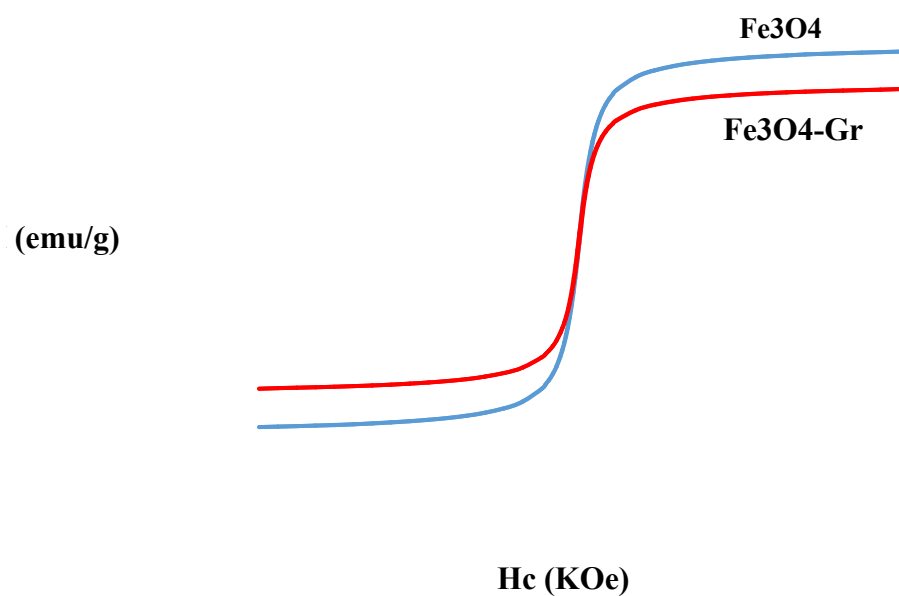

**Fig. 1S.** VSM magnetization curves of Fe<sub>3</sub>O<sub>4</sub> NPs and (b) Fe<sub>3</sub>O<sub>4</sub>-Gr NPs.

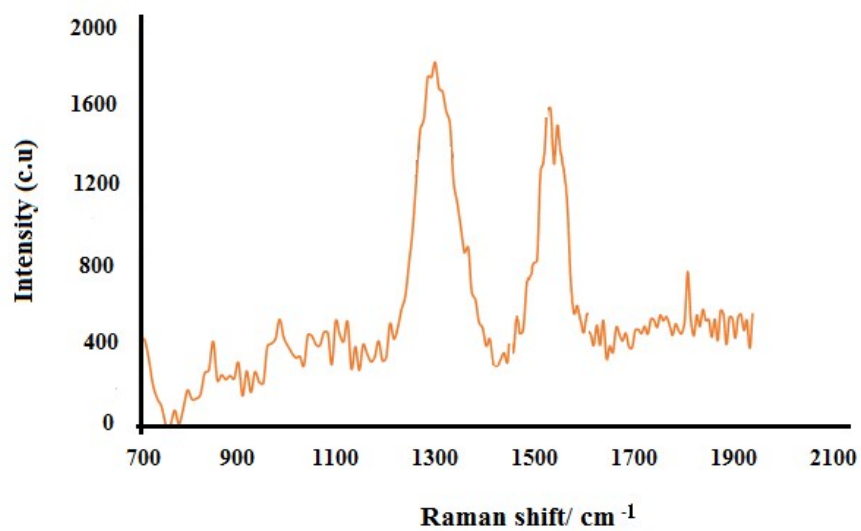

**Fig. 2S.** Raman spectrum of Fe<sub>3</sub>O<sub>4</sub>-Gr
